# Supplementary material for: The Role of Sfp1 in Candida albicans Cell Wall Maintenance
Source: MDPI journal article supplement (doi:10.3390/jof8111196), 2022-11-13
Supplement: s1 [file s1]

# Supplementary Materials

**Table S1.** *C. albicans* strains used in this study.

| Strain Name                | Genotype                                                      | Source     |
|----------------------------|---------------------------------------------------------------|------------|
| SC5314                     | Wild type                                                     | [1]        |
| <i>sfp1Δ/Δ</i> 1-3         | <i>sfp1Δ::FRT/sfp1Δ::FRT</i>                                  | [2]        |
| <i>sfp1Δ/Δ</i> 6-17        | <i>sfp1Δ::FRT/sfp1Δ::FRT</i>                                  | [2]        |
| <i>SFP1</i> -reintegration | <i>sfp1Δ::SFP1-FRT/ sfp1Δ::SFP1-FRT</i>                       | [2]        |
| <i>cas5Δ/Δ</i>             | <i>cas5Δ::FRT/cas5Δ::FRT</i>                                  | This study |
| <i>sfp1Δ/Δ cas5Δ/Δ</i>     | <i>sfp1Δ::FRT/sfp1Δ::FRT</i><br><i>cas5Δ::FRT/ cas5Δ::FRT</i> | This study |
| HA- <i>SFP1</i>            | <i>sfp1Δ::FRT/sfp1Δ::FRT</i><br><i>ENO1/ENO1::HA-SFP1</i>     | This study |

**Table S2.** Primers used in this study.

| Primer Name                    | Sequence (5' to 3') <sup>a</sup>                                                                                 |
|--------------------------------|------------------------------------------------------------------------------------------------------------------|
| <b>For real-time qPCR</b>      |                                                                                                                  |
| qPMA1-F                        | TTGCTTATGATAATGCTCCATACGA                                                                                        |
| qPMA1-R                        | TACCCACAATCTTGGCAAGT                                                                                             |
| qFKS1-F                        | TGATACTGGTAATCATAGACCAAAAA                                                                                       |
| qFKS1-R                        | AACCTCTGAATGGATTTGTAGAATAAGG                                                                                     |
| qXOG1-F                        | GGGTTGTTATGCTAAAAAGGA                                                                                            |
| qXOG1-R                        | AATCTGTCAAAGCAGCAGACCAT                                                                                          |
| qCHS1-F                        | TTGGAACCGG TGGAACATCT                                                                                            |
| qCHS1-R                        | AGACCATAGGTGGACAACAATGAA                                                                                         |
| qCHS3-F                        | TGTTTGTTCCCTAAAGCTGCTTGTA                                                                                        |
| qCHS3-R                        | AACGACGACGTTGCGATAATAA                                                                                           |
| qCHS8-F                        | AAACGAATGCTGATGGATCCA                                                                                            |
| qCHS8-R                        | CCAGCGACAATCCATAAAATGA                                                                                           |
| qSFP1-F                        | GCACGTCACCTCTACGTTATGG                                                                                           |
| qSFP1-R                        | CGATGACCGGGCACTTG                                                                                                |
| CAS5-qF1                       | TGAAAACCTCCTCTTCGAGGTCAT                                                                                         |
| CAS5-qR2                       | GCAGCAGTAACAGCAGCATTG                                                                                            |
| <b>For strain construction</b> |                                                                                                                  |
| CAS5UR-F-KpnI                  | GTGAGGT <u>ACCC</u> ATCCACCCCCTACAATCAA                                                                          |
| CAS5UR-R-XhoI                  | GACCCTCGAGGGTGGGATGAAAAGCAAAGT                                                                                   |
| CAS5DR-F-SacII                 | GCTTCCGCGGTGAATGTCAAATGCCAAACTG                                                                                  |
| CAS5DR-F-SacI                  | GCAGGAGCTCTCATCATGCGAGTTATGGTTT                                                                                  |
| SphI-HA-SFP1-F                 | <u>AGCATG</u> Ctacgacgtaccagattacgcttacgacgtaccagattacgcttacgac-<br>gtaccagattacgctTTTAATACCAAGATATTTGAAAATACAGG |
| SphI-HA-SFP1-R <sup>a</sup>    | <u>AGCATG</u> CCTTAATGAGTGGTATGCCCCAC                                                                            |
| <b>For ChIP</b>                |                                                                                                                  |
| CAS5 promoter qF               | CAATATAAGCGGGTTATCTAGAATTAGAC                                                                                    |
| CAS5 promoter qR               | ATCCACTAGTTTAGGAAATACCTAATAAAC                                                                                   |
| ADE2 promoter qF               | AATGAGCTGAATCCACGACAAA                                                                                           |
| ADE2 promoter qR               | CACGTGACCCAAGAGTTTTAATGT                                                                                         |

<sup>a</sup> The restriction sites are underlined and lowercase letters denote the HA tag sequence.

**Table S3.** Differential regulation of a subset of genes by Sfp1 and Cas5.

| Orf19 ID                               | Gene Name          | <i>sfp1</i> Δ/Δ v.s WT<br>(Relative Fold Change) <sup>a,b</sup> | <i>cas5</i> Δ/Δ v.s WT<br>(Relative Fold Change) <sup>c</sup> |
|----------------------------------------|--------------------|-----------------------------------------------------------------|---------------------------------------------------------------|
| <b>Glucan synthase &amp; Glucanase</b> |                    |                                                                 |                                                               |
| orf19.2990                             | <i>XOG1</i>        | 26.25                                                           | -2.8                                                          |
| <b>GPI-anchored proteins</b>           |                    |                                                                 |                                                               |
| orf19.4765                             | <i>PGA6</i>        | 1.71                                                            | -2.1                                                          |
| orf19.2758                             | <i>PGA38</i>       | 1.62                                                            | -3                                                            |
| orf19.4910                             | <i>FGR41</i>       | 1.55                                                            | -2.78                                                         |
| <b>Adhesin</b>                         |                    |                                                                 |                                                               |
| orf19.1816                             | <i>ALS3</i>        | 1.51                                                            | -1.73                                                         |
| orf19.5032                             | <i>SIM1</i>        | 2.57                                                            | -1.5                                                          |
| orf19.1258                             | <i>C4_05730W_A</i> | 2.69                                                            | -5.16                                                         |
| <b>Others</b>                          |                    |                                                                 |                                                               |
| orf19.4670                             | <i>CAS5</i>        | 1.96                                                            | -27.78                                                        |
| orf19.7218                             | <i>RBE1</i>        | 2.97                                                            | -2.73                                                         |
| orf19.220                              | <i>PIR1</i>        | 1.53                                                            | -2.2                                                          |
| orf19.3893                             | <i>SCW11</i>       | 2.11                                                            | -3.1                                                          |
| orf19.3618                             | <i>YWP1</i>        | 1.96                                                            | -2.92                                                         |
| orf19.675                              | <i>C1_11270W_A</i> | 2.45                                                            | -2.09                                                         |

<sup>a</sup> Lee, S. Y., Chen, H. F., Yeh, Y. C., Xue, Y. P., & Lan, C. Y. (2019). The transcription factor Sfp1 regulates the oxidative stress response in *Candida albicans*. *Microorganisms*, 7(5), 131. <sup>b</sup> The GEO accession number GSE127184. <sup>c</sup> Xie, J. L., Qin, L., Miao, Z., Grysb, B. T., Diaz, J. D. L. C., Ting, K., ... & Cowen, L. E. (2017). The *Candida albicans* transcription factor Cas5 couples stress responses, drug resistance and cell cycle regulation. *Nature Communications*, 8(1), 1-18.

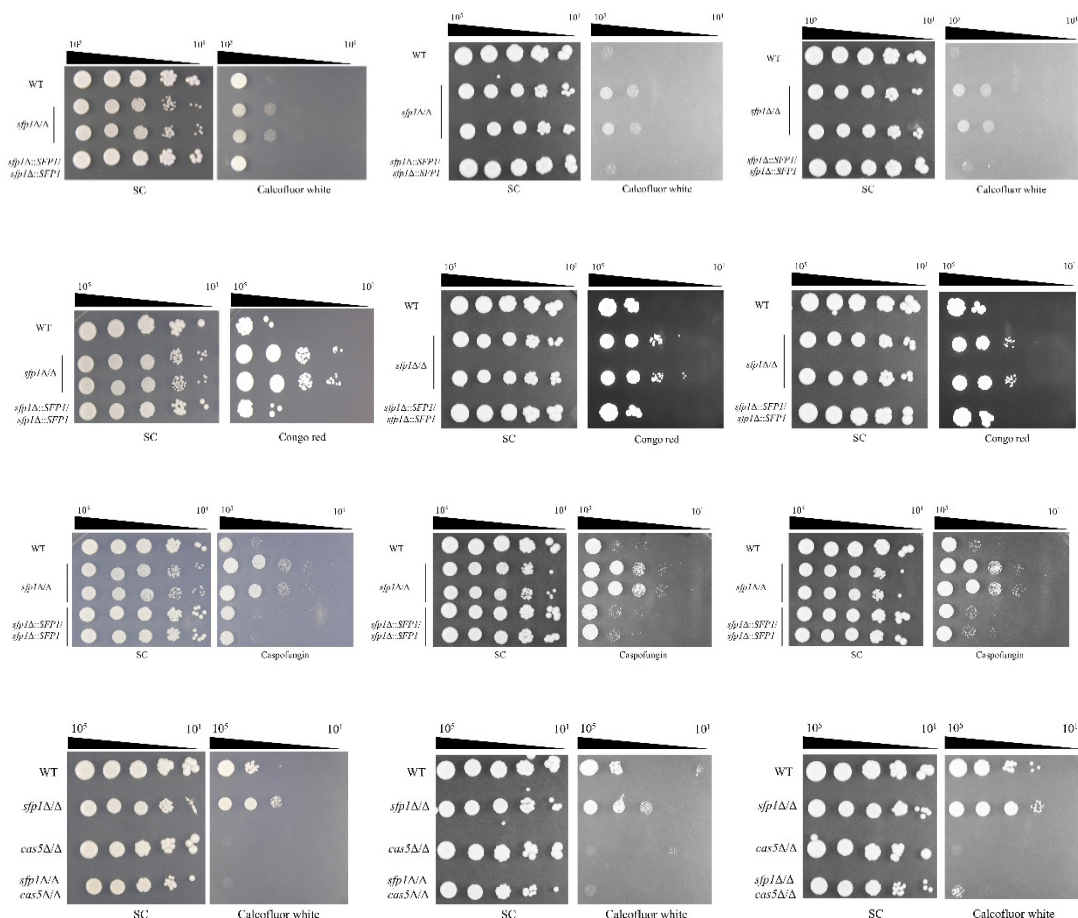

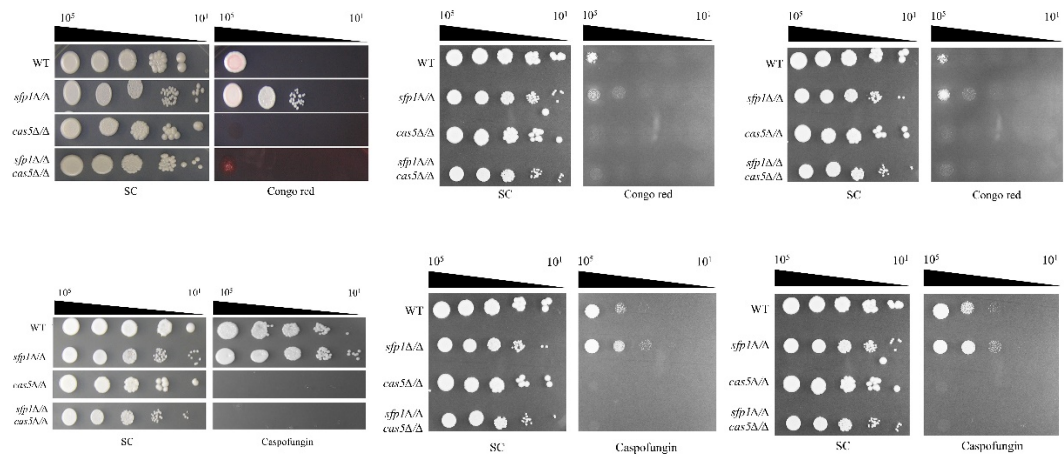

**Figure S1.** Images of three independent experiments of spot assay shown in Figures 1a,b, 2 and 5a–c.

## References

1. Gillum, A.M.; Tsay, E.Y.; Kirsch, D.R. Isolation of the *Candida albicans* gene for orotidine-5'-phosphate decarboxylase by complementation of *S. cerevisiae* *ura3* and *E. coli* *pyrF* mutations. *Mol. Gen. Genet.* **1984**, *198*, 179–182.
2. Chen, H.F.; Lan, C.Y. Role of *SFP1* in the regulation of *Candida albicans* biofilm formation. *PLoS ONE* **2015**, *10*, e0129903.
